# Supplementary material
Source: publisher site journal article supplement (https://www.dovepress.com/article/295552)

**Supplementary materials**

**Supplementary Table S1 The clinicopathologic features of colorectal cancer patients with low or high circ-PI4KA expression.** Circular RNA phosphatidylinositol 4-kinase alpha (circ-PI4KA).

|  | Characteristics  n=27 | circ-PI4KA expression | | *P* valuea |
| --- | --- | --- | --- | --- |
|  |  | Low(n=13) | High(n=14) |  |
| Gender |  |  |  | 0.5812 |
| Female | 11 | 6 | 5 |  |
| Male | 16 | 7 | 9 |  |
| Age (years) |  |  |  | 0.0814 |
| ≤60 | 10 | 7 | 3 |  |
| >60 | 17 | 6 | 11 |  |
| TNM grade |  |  |  | 0.0700 |
| I+II | 8 | 6 | 2 |  |
| III+IV | 19 | 7 | 12 |  |
| Lymph node metastasis |  |  |  | 0.0341* |
| Positive | 16 | 5 | 11 |  |
| Negative | 11 | 8 | 3 |  |
| Tumor size |  |  |  | 0.0027* |
| ≤3 cm | 9 | 8 | 1 |  |
| >3 cm | 18 | 5 | 13 |  |

TNM, tumor-node-metas-tasis; **P* < 0.05 aChi-square test


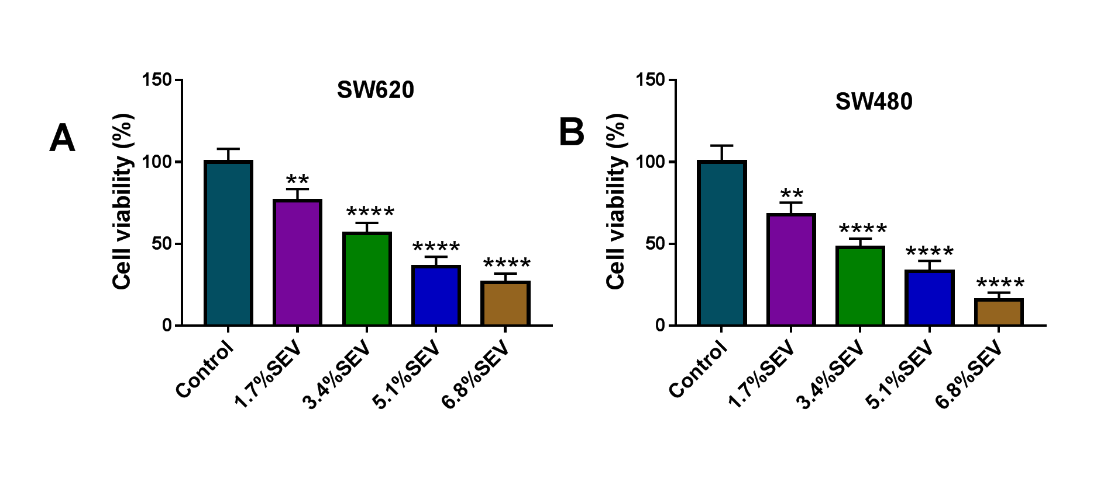
**Supplementary Figure S1 MTT assay was employed to detect the IC50 values of SEV in both the SW620 and SW480 cells.** ***P*<0.01 and *****P*<0.0001. Sevoflurane (SEV); 3-(4,5)-dimethylthiahiazo (-z-y1)-3,5-di-phenytetrazoliumromide (MTT).

**Supplementary Figure S2 Circ-PI4KA overexpression promoted the cell malignancy of colon cancer.** (*A* and *B*) The impact of circ-PI4KA overexpression on cell viability and colony-forming ability were demonstrated by MTT and cell colony formation assays, respectively. (*C*) EDU assay was performed to detect cell proliferation in SW620 and SW480 cells. (*D* and *E*) The effects of circ-PI4KA overexpression on the migration and invasion of SW620 and SW480 cells were presented by transwell assay. ***P*<0.01, ****P*<0.001 and *****P*<0.0001. Circular RNA phosphatidylinositol 4-kinase alpha (circ-PI4KA); 3-(4,5)-dimethylthiahiazo (-z-y1)-3,5-di-phenytetrazoliumromide (MTT); 5-Ethynyl-29-deoxyuridine (EdU).


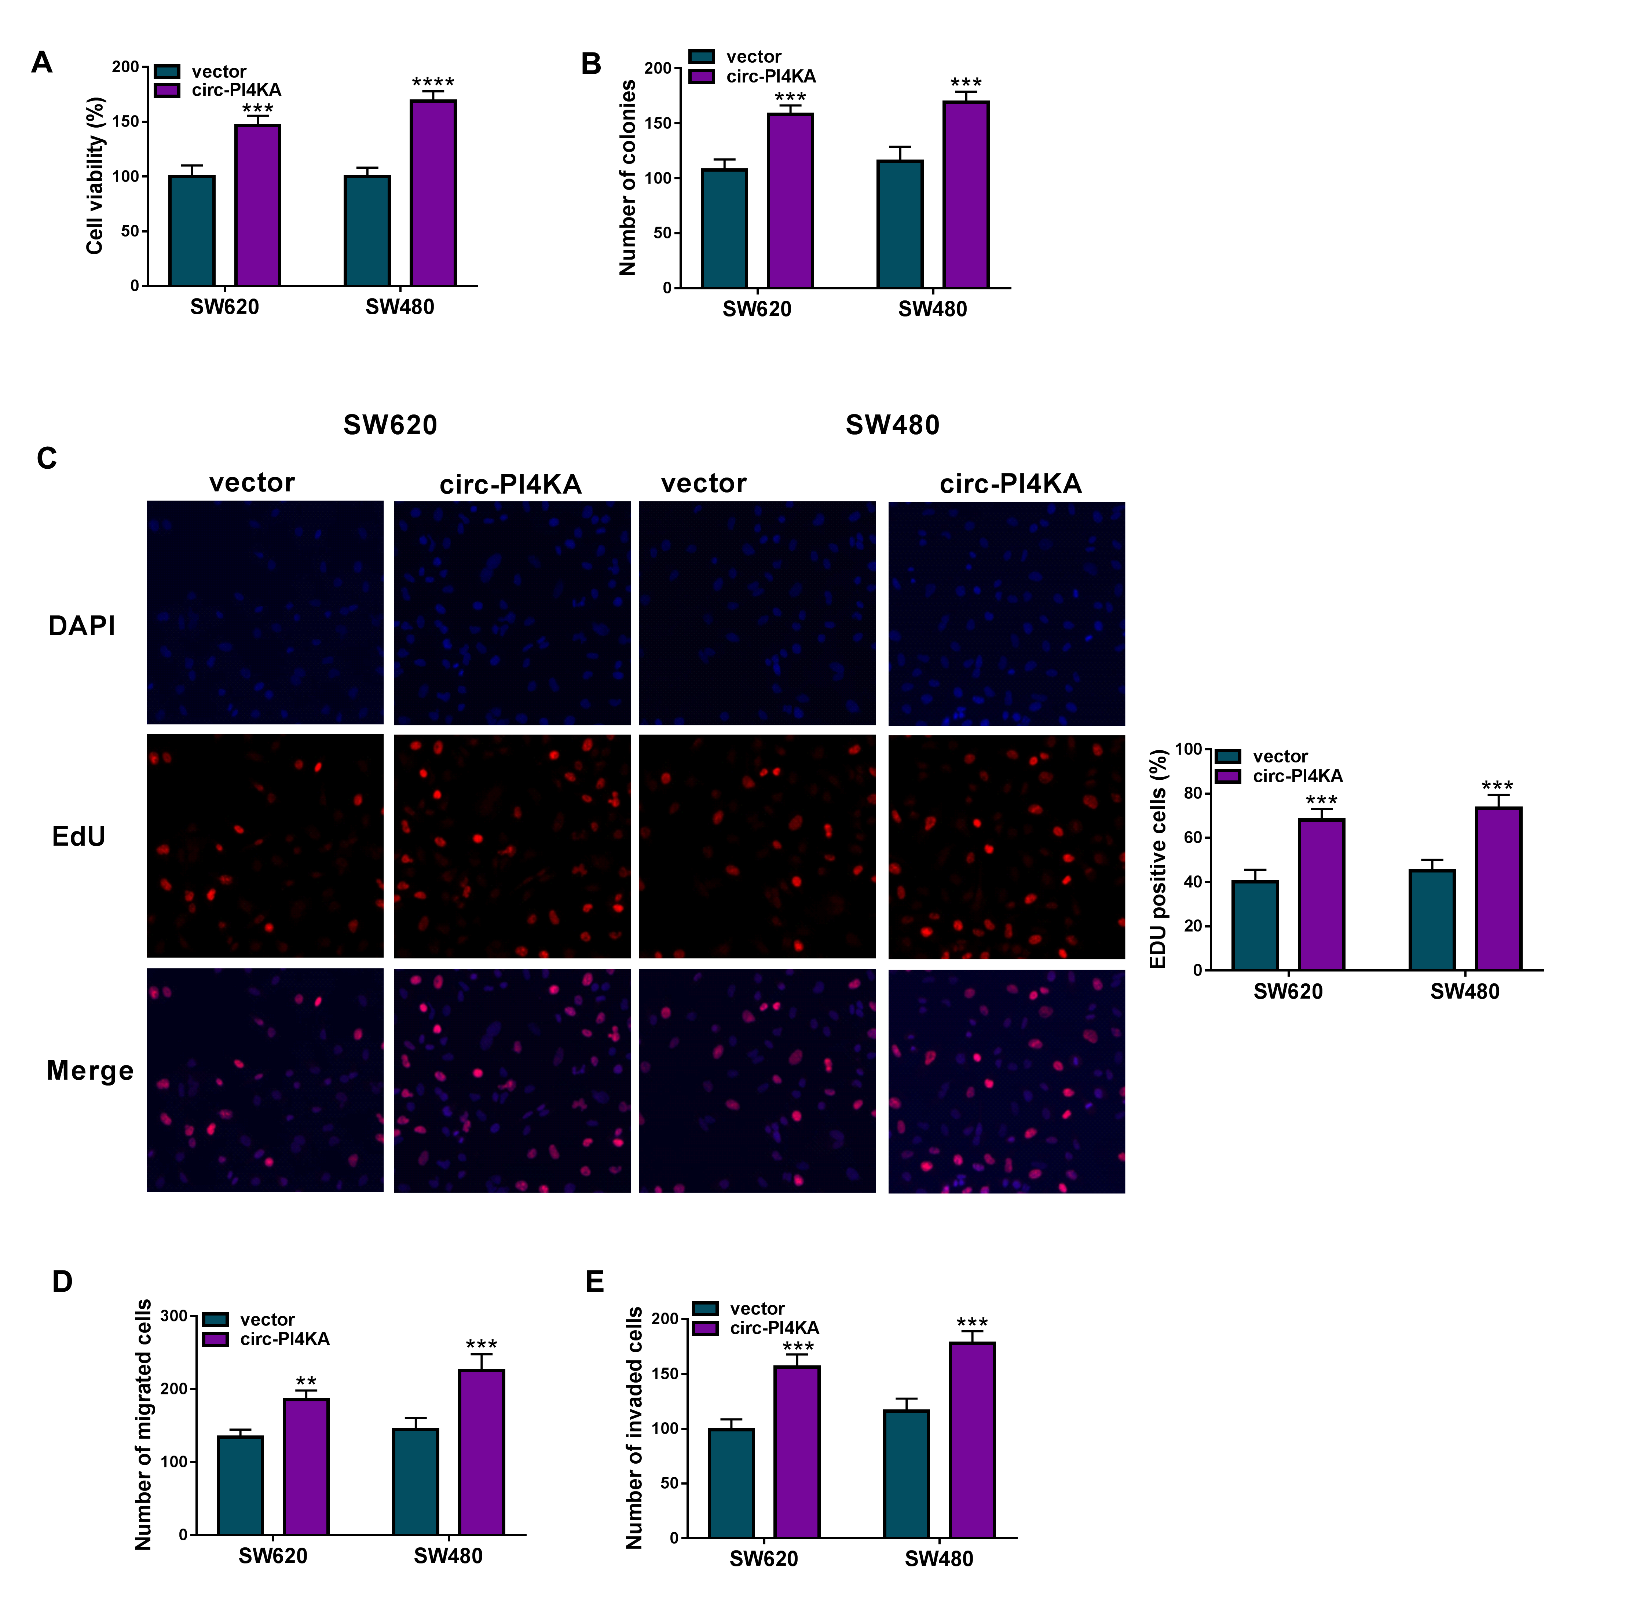


**Supplementary Figure S3 MiR-331-3p depletion promoted the cell malignancy of colon cancer.** (*A* and *B*) The impact of miR-331-3p inhibitor on cell viability and colony-forming ability were demonstrated by MTT and cell colony formation assays, respectively. (*C* and *D*) The effects of miR-331-3p knockdown on the migration and invasion of SW620 and SW480 cells were presented by transwell assay. **P*<0.05, ***P*<0.01 and ****P*<0.001. 3-(4,5)-dimethylthiahiazo (-z-y1)-3,5-di-phenytetrazoliumromide (MTT).


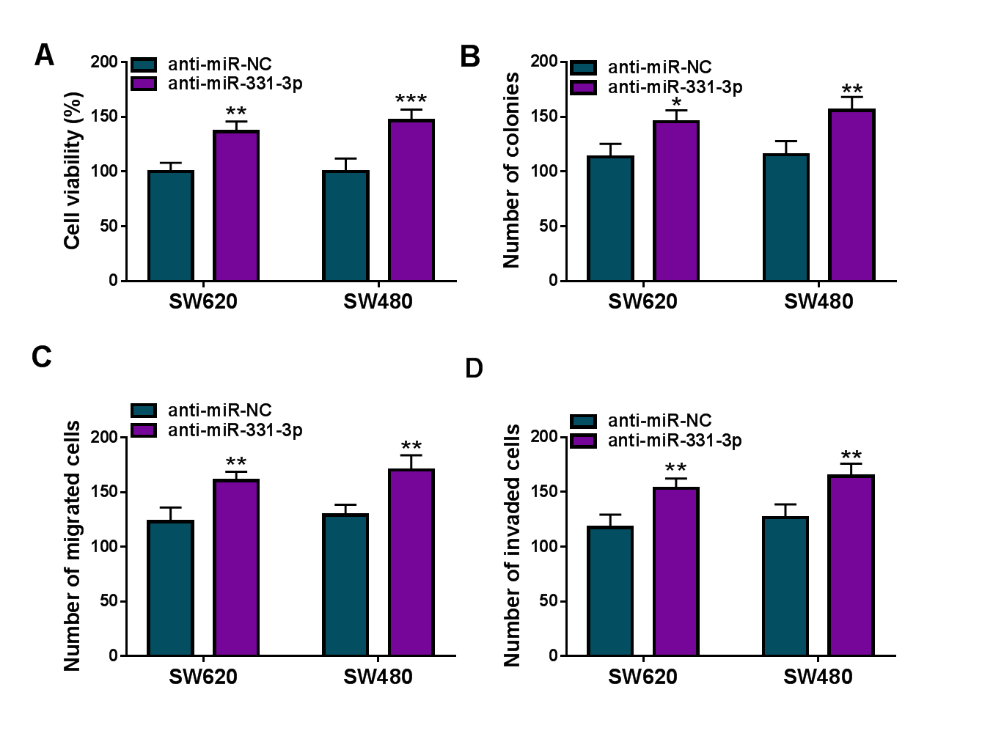


**Supplementary Figure S4 Circ-PI4KA silencing repressed tumor formation *in vivo*.** (*A* and *B*) The effects of circ-PI4KA silencing on tumor volume and weight were revealed. (*C*) The impact of circ-PI4KA knockdown on circ-PI4KA expression was determined by qRT-PCR. ***P*<0.01 and *****P*<0.0001. Circular RNA phosphatidylinositol 4-kinase alpha (circ-PI4KA); quantitative real-time polymerase chain reaction (qRT-PCR).


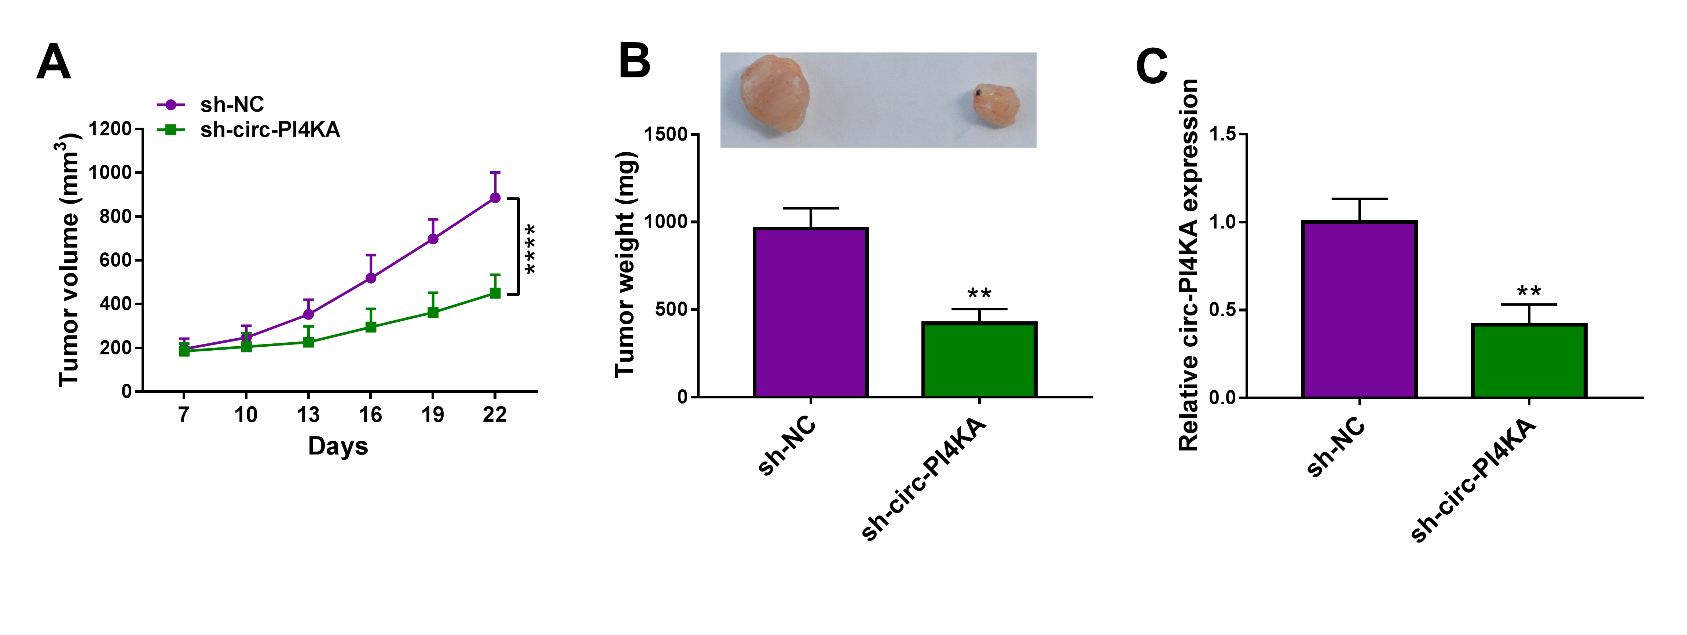


**Supplementary Figure S5 Circ-PI4KA overexpression contributed to tumor formation *in vivo*.** (*A* and *B*) The effects of circ-PI4KA overexpression on tumor volume and weight were revealed. (*C*) The impact of circ-PI4KA on circ-PI4KA expression was determined by qRT-PCR. ***P*<0.01. Circular RNA phosphatidylinositol 4-kinase alpha (circ-PI4KA); quantitative real-time polymerase chain reaction (qRT-PCR).


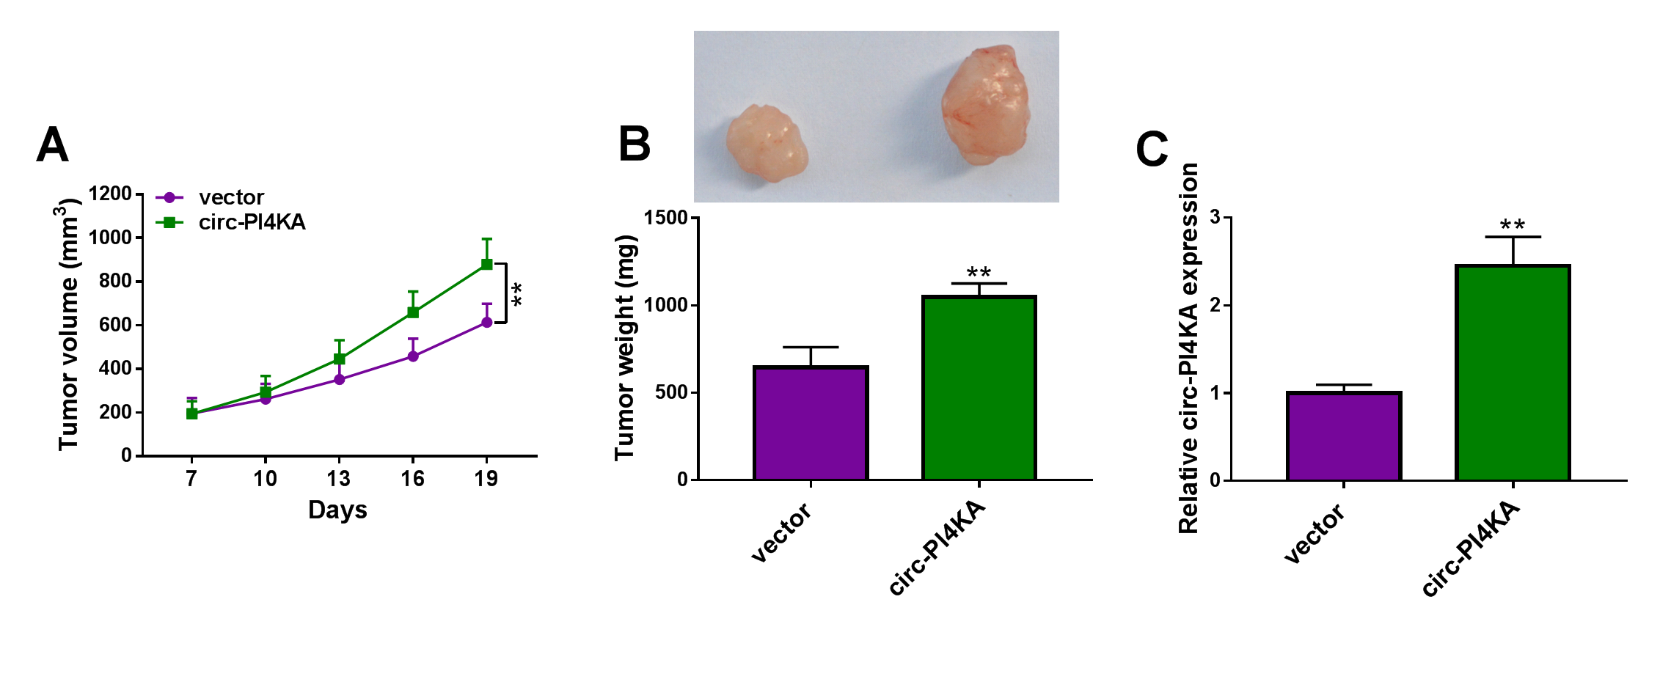

Supplement: Supplementary file 1 [file get_supplementary_file.php]
